# Supplementary material for: Prevalence and Factors Associated with Mental Health Impact of COVID-19 Pandemic in Bangladesh: A Survey-Based Cross-Sectional Study
Source: PubMed Central journal article supplement (PMC8086734; doi:10.5334/aogh.3269), 2021-04-26
Supplement: agh-87-1-3269-s1.pdf [file agh-87-1-3269-s1.pdf]

**Supplementary Table 1: Sample of survey items and their test of reliability**

| Did not apply<br>to me at all (0)                                                                                                       | Applied to me to some<br>degree or some of the time<br>(1) | Applied to me to a considerable<br>degree or most of the time (2) | Applied to me very much<br>or most of the time (3) |
|-----------------------------------------------------------------------------------------------------------------------------------------|------------------------------------------------------------|-------------------------------------------------------------------|----------------------------------------------------|
| <b>Depression subscale</b>                                                                                                              |                                                            |                                                                   | Cronbach's Alpha                                   |
| 3. I couldn't seem to experience any positive feeling at all                                                                            |                                                            |                                                                   | 0.7618                                             |
| 5. I found it difficult to work up the initiative to do things                                                                          |                                                            |                                                                   | 0.7661                                             |
| 10. I felt that I had nothing to look forward to                                                                                        |                                                            |                                                                   | 0.7594                                             |
| 13. I felt downhearted and blue                                                                                                         |                                                            |                                                                   | 0.7690                                             |
| 16. I was unable to become enthusiastic about anything                                                                                  |                                                            |                                                                   | 0.7650                                             |
| 17. I felt I wasn't worth much as a person                                                                                              |                                                            |                                                                   | 0.7330                                             |
| 21. I felt that life was meaningless                                                                                                    |                                                            |                                                                   | 0.7633                                             |
| <b>Anxiety subscale</b>                                                                                                                 |                                                            |                                                                   | Cronbach's Alpha                                   |
| 2. I was aware of dryness of my mouth                                                                                                   |                                                            |                                                                   | 0.6644                                             |
| 4. I experienced breathing difficulty (e.g. excessively rapid breathing, breathlessness in the absence of physical exertion)            |                                                            |                                                                   | 0.6768                                             |
| 7. I experienced trembling (e.g. in the hands)                                                                                          |                                                            |                                                                   | 0.7720                                             |
| 9. I was worried about situations in which I might panic and make a fool of myself                                                      |                                                            |                                                                   | 0.6668                                             |
| 15. I felt I was close to panic                                                                                                         |                                                            |                                                                   | 0.6648                                             |
| 19. I was aware of the action of my heart in the absence of physical exertion (e.g. sense of heart rate increase, heart missing a beat) |                                                            |                                                                   | 0.6513                                             |
| 20. I felt scared without any good reason                                                                                               |                                                            |                                                                   | 0.6511                                             |
| <b>Stress subscale</b>                                                                                                                  |                                                            |                                                                   | Cronbach's Alpha                                   |
| 1. I found it hard to wind down                                                                                                         |                                                            |                                                                   | 0.8100                                             |
| 6. I tended to over-react to situations                                                                                                 |                                                            |                                                                   | 0.7894                                             |
| 8. I felt that I was using a lot of nervous energy                                                                                      |                                                            |                                                                   | 0.7776                                             |
| 11. I found myself getting agitated                                                                                                     |                                                            |                                                                   | 0.7877                                             |
| 12. I found it difficult to relax                                                                                                       |                                                            |                                                                   | 0.7775                                             |
| 14. I was intolerant of anything that kept me from getting on with what I was doing                                                     |                                                            |                                                                   | 0.7822                                             |
| 18. I felt that I was rather touchy                                                                                                     |                                                            |                                                                   | 0.7823                                             |
