# Supplementary material for: Prevalence and Factors Associated with Mental Health Impact of COVID-19 Pandemic in Bangladesh: A Survey-Based Cross-Sectional Study
Source: PubMed Central journal article supplement (PMC8086734; doi:10.5334/aogh.3269), 2021-04-26
Supplement: agh-87-1-3269-s2.pdf [file agh-87-1-3269-s2.pdf]

## Supplementary Table 2

### A survey questionnaire on Mental health and psychological impact of the coronavirus disease 2019 (COVID-19) outbreak: A cross-sectional study on Bangladeshi People

#### Socio-Demographic Profile of the Respondent:

| Name                           |                   |    |
|--------------------------------|-------------------|----|
| <b>What is your gender</b>     | Male              | 1  |
|                                | Female            | 2  |
|                                | Other             | 88 |
| <b>Level of study (year)</b>   | Under SSC         | 1  |
|                                | SSC or Equivalent | 2  |
|                                | HSC or Equivalent | 3  |
|                                | Graduate          | 4  |
|                                | Post Graduate     | 5  |
|                                | Doctorate         | 6  |
|                                | Post Doctorate    | 7  |
|                                | Other             | 88 |
| <b>Your Mother's Schooling</b> | Under SSC         | 1  |
|                                | SSC or Equivalent | 2  |
|                                | HSC or Equivalent | 3  |
|                                | Graduate          | 4  |
|                                | Post Graduate     | 5  |
|                                | Doctorate         | 6  |
|                                | Post Doctorate    | 7  |
|                                | Other             | 88 |

|                                                   |                        |    |
|---------------------------------------------------|------------------------|----|
| <b>Your Father's Schooling</b>                    | Under SSC              | 1  |
|                                                   | SSC or Equivalent      | 2  |
|                                                   | HSC or Equivalent      | 3  |
|                                                   | Graduate               | 4  |
|                                                   | Post Graduate          | 5  |
|                                                   | Doctorate              | 6  |
|                                                   | Post Doctorate         | 7  |
|                                                   | Other                  | 88 |
| <b>What is your age?</b>                          |                        | ## |
| <b>Marital Status</b>                             | Single                 | 1  |
|                                                   | Married                | 2  |
|                                                   | Divorced               | 3  |
|                                                   | Widowed                | 4  |
| <b>What is your professional status?</b>          | Student                | 1  |
|                                                   | Working (Full Time)    | 2  |
|                                                   | Working (Part-Time)    | 3  |
|                                                   | None                   | 4  |
| <b>Living Arrangement</b>                         | Living Alone           | 1  |
|                                                   | Living with Family     | 2  |
|                                                   | Living with flatmates  | 3  |
|                                                   | Others                 | 88 |
| <b>Which district are you currently living in</b> |                        | ## |
| <b>Which district you originally belong to</b>    |                        | ## |
| <b>Have you been tested for COVID-19?</b>         | Yes, I tested positive | 1  |
|                                                   | Yes, I tested negative | 2  |
|                                                   | No                     | 3  |

|                                                                                                                  |                                                             |   |
|------------------------------------------------------------------------------------------------------------------|-------------------------------------------------------------|---|
| <b>Have you enforced protective measures inside your home to protect yourself and your family from COVID 19?</b> | Yes                                                         | 1 |
|                                                                                                                  | No                                                          | 2 |
| <b>Are you currently in Self-Quarantine since past seven days?</b>                                               | Yes                                                         | 1 |
|                                                                                                                  | No                                                          | 2 |
| <b>What sort of protective measures have you taken?</b>                                                          | Avoid public transportation                                 | 1 |
|                                                                                                                  | Avoid shaking hands                                         | 2 |
|                                                                                                                  | Wearing face mask                                           | 3 |
|                                                                                                                  | Avoid large gatherings                                      | 4 |
|                                                                                                                  | Advocating people about the health risk related to COVID-19 | 5 |
|                                                                                                                  | All of the above                                            | 6 |
|                                                                                                                  | None of the above                                           | 7 |
| <b>What is your household size?</b>                                                                              | One person                                                  | 1 |
|                                                                                                                  | Two people                                                  | 2 |
|                                                                                                                  | Three to five people                                        | 3 |
|                                                                                                                  | Six people or more                                          | 4 |

**Physical Health Status** (Please respond on your physical health since the past two weeks)

|                                                           | <b>Yes (1)</b> | <b>No (2)</b> |
|-----------------------------------------------------------|----------------|---------------|
| <b>Persistent fever &gt;98 ° 'F' for at least one day</b> |                |               |
| <b>Chills</b>                                             |                |               |
| <b>Headache</b>                                           |                |               |
| <b>Cough</b>                                              |                |               |
| <b>Breathing Difficulty</b>                               |                |               |
| <b>Dizziness</b>                                          |                |               |
| <b>Sore Throat</b>                                        |                |               |
| <b>Persistent fever and cough or difficulty breathing</b> |                |               |

### **Mental Health Impact of COVID 19:**

Please read each statement and circle a number 1, 2, 3 or 4 which shows how much the statement has applied in the past week to you. There are no correct answers or incorrect answers.

|                                                                                                                                  | <b>Did not apply to me at all (1)</b> | <b>Applied to me to some degree or some of the time (2)</b> | <b>Applied to me to a considerable degree or most of the time (3)</b> | <b>Applied to me very much or most of the time (4)</b> |
|----------------------------------------------------------------------------------------------------------------------------------|---------------------------------------|-------------------------------------------------------------|-----------------------------------------------------------------------|--------------------------------------------------------|
| <b>I found it hard to wind down</b>                                                                                              |                                       |                                                             |                                                                       |                                                        |
| <b>I was aware of dryness of my mouth</b>                                                                                        |                                       |                                                             |                                                                       |                                                        |
| <b>I couldn't seem to experience any positive feeling at all</b>                                                                 |                                       |                                                             |                                                                       |                                                        |
| <b>I experienced breathing difficulty (e.g. excessively rapid breathing, breathlessness in the absence of physical exertion)</b> |                                       |                                                             |                                                                       |                                                        |
| <b>I found it difficult to work up the initiative to do things</b>                                                               |                                       |                                                             |                                                                       |                                                        |
| <b>I tended to over-react to situations</b>                                                                                      |                                       |                                                             |                                                                       |                                                        |
| <b>I experienced trembling (e.g. in the hands)</b>                                                                               |                                       |                                                             |                                                                       |                                                        |
| <b>I felt that I was using a lot of nervous energy</b>                                                                           |                                       |                                                             |                                                                       |                                                        |
| <b>I was worried about situations in which I might panic and make a fool of myself</b>                                           |                                       |                                                             |                                                                       |                                                        |
| <b>I felt that I had nothing to look forward to</b>                                                                              |                                       |                                                             |                                                                       |                                                        |
| <b>I found myself getting agitated</b>                                                                                           |                                       |                                                             |                                                                       |                                                        |
| <b>I found it difficult to relax</b>                                                                                             |                                       |                                                             |                                                                       |                                                        |
| <b>I felt down-hearted and blue</b>                                                                                              |                                       |                                                             |                                                                       |                                                        |
| <b>I was intolerant of anything that kept me from getting</b>                                                                    |                                       |                                                             |                                                                       |                                                        |

|                                                                                                                                            |  |  |  |  |
|--------------------------------------------------------------------------------------------------------------------------------------------|--|--|--|--|
| <b>on with what I was doing</b>                                                                                                            |  |  |  |  |
| <b>I felt I was close to panic</b>                                                                                                         |  |  |  |  |
| <b>I was unable to become enthusiastic about anything</b>                                                                                  |  |  |  |  |
| <b>I felt I wasn't worth much as a person</b>                                                                                              |  |  |  |  |
| <b>I felt that I was rather touchy</b>                                                                                                     |  |  |  |  |
| <b>I was aware of the action of my heart in the absence of physical exertion (e.g. sense of heart rate increase, heart missing a beat)</b> |  |  |  |  |
| <b>I felt scared without any good reason</b>                                                                                               |  |  |  |  |
| <b>I felt that life was meaningless</b>                                                                                                    |  |  |  |  |

Thank you for your participation

1. Akram A, Yeasmin M, Khan TEU, Khan MAAZ, Monir MBB, Tarana MN et al. Demographic Characteristics of 1082 Positive Cases of COVID-19 Patients: Experience at National Referral Laboratory of Bangladesh. Bangladesh Journal of Infectious Diseases. 2020:S22-S6.
